# Supplementary material for: Artificial Neural Networks to Predict the Apparent Degree of Supersaturation in Supersaturated Lipid-Based Formulations: A Pilot Study
Source: MDPI journal article supplement (doi:10.3390/pharmaceutics13091398), 2021-09-05
Supplement: s1 [file s1]

---

# Supplementary Materials: Artificial Neural Networks to Predict the Apparent Degree of Supersaturation in Supersaturated Lipid-Based Formulations: A Pilot Study.

Harriet Bennett-Lenane, Joseph P. O'Shea, Jack D. Murray, Alexandra-Roxana Ilie, René Holm, Martin Kuentz and Brendan T.

**Table S1.** Equilibrium solubility values ( $\mu\text{g/mL}$ ) and aDS for the dataset of 21 drugs using Capmul MCM and Maisine CC. AT refers to Ambient Temperature. Data in brackets refer to standard deviation (SD) of solubility value or standard error (SE) of aDS ratios. \* denotes data obtained from a previous publication (1).

| Drug Compound   | AT Solubility<br>Capmul MCM | AT Solubility<br>Maisine CC | Solubility 60°C<br>sLBF <sub>Capmul</sub> <sup>MC</sup> | Solubility 60°C<br>sLBF <sub>Maisine</sub> <sup>LC</sup> | aDS<br>sLBF <sub>Capmul</sub> <sup>MC</sup> | aDS<br>sLBF <sub>Maisine</sub> <sup>LC</sup> |
|-----------------|-----------------------------|-----------------------------|---------------------------------------------------------|----------------------------------------------------------|---------------------------------------------|----------------------------------------------|
| Carvedilol      | 45.07 (2.94)                | 10.28 (0.70)                | 127.90 (2.77)                                           | 28.91 (1.79)                                             | 2.84 (0.11)                                 | 2.81 (0.15)                                  |
| Celecoxib       | 49.78 (5.61)*               | 13.30 (1.11)*               | 88.10 (6.67)                                            | 36.16 (2.83)                                             | 1.77 (0.14)                                 | 2.72 (0.18)                                  |
| Cinnarizine     | 35.97 (1.03)*               | 29.27 (1.01)*               | 81.67 (3.98)                                            | 86.64 (6.54)                                             | 2.27 (0.07)                                 | 2.96 (0.14)                                  |
| Clotrimazole    | 192.06 (5.91)               | 91.05 (3.73)                | 311.16 (13.89)                                          | 170.82 (5.27)                                            | 1.62 (0.05)                                 | 1.88 (0.06)                                  |
| Danazol         | 16.32 (4.52)                | 11.19 (0.64)                | 42.91 (1.85)                                            | 22.41 (0.95)                                             | 2.63 (0.43)                                 | 2.00 (0.08)                                  |
| Dipyridamole    | 10.17 (0.98)                | 1.38 (0.17)                 | 32.22 (3.12)                                            | 4.71 (0.61)                                              | 3.17 (0.25)                                 | 3.42 (0.36)                                  |
| Felodipine      | 74.41 (4.63)                | 36.79 (1.04)                | 125.73 (12.40)                                          | 49.71 (6.19)                                             | 1.69 (0.11)                                 | 1.35 (0.10)                                  |
| Fenofibrate     | 76.95 (6.66)                | 50.11 (1.38)                | 136.98 (11.10)                                          | 144.38 (8.82)                                            | 1.78 (0.12)                                 | 2.88 (0.11)                                  |
| Fenofibric acid | 11.81 (4.77)                | 7.80 (0.26)                 | 36.28 (1.55)                                            | 18.45 (0.56)                                             | 3.07 (0.72)                                 | 2.37 (0.06)                                  |
| Griseofulvin    | 4.70 (0.51)                 | 1.92 (0.01)                 | 12.55 (0.52)                                            | 3.68 (0.26)                                              | 2.67 (0.18)                                 | 1.91 (0.08)                                  |
| Haloperidol     | 31.37 (1.34)                | 7.63 (0.94)                 | 46.03 (1.43)                                            | 14.22 (0.45)                                             | 1.47 (0.04)                                 | 1.86 (0.14)                                  |
| Ibuprofen       | 237.34 (14.85)              | 128.67 (4.05)               | 616.10 (103.62)                                         | 436.41 (46.36)                                           | 2.60 (0.27)                                 | 3.39 (0.22)                                  |
| Indometacine    | 21.31 (0.70)                | 7.84 (0.30)                 | 35.53 (1.55)                                            | 14.45 (0.25)                                             | 1.67 (0.05)                                 | 1.84 (0.04)                                  |
| Itraconazole    | 1.99 (0.02)                 | 0.53 (0.01)                 | 5.12 (0.49)                                             | 1.16 (0.03)                                              | 2.57 (0.14)                                 | 2.18 (0.03)                                  |
| JNJ-2a          | 283.07 (15.58)*             | 47.50 (1.24)                | 293.35 (27.73)                                          | 76.48 (2.92)                                             | 1.04 (0.07)                                 | 1.61 (0.04)                                  |
| Ketoconazole    | 104.92 (3.32)               | 29.62 (0.25)                | 221.22 (2.98)                                           | 66.14 (5.06)                                             | 2.11 (0.04)                                 | 2.23 (0.10)                                  |
| Naproxen        | 39.21 (4.83)                | 17.27 (1.98)                | 50.73 (6.04)                                            | 25.90 (0.45)                                             | 1.29 (0.13)                                 | 1.50 (0.10)                                  |
| Niclosamide     | 8.73 (0.55)                 | 3.21 (0.25)                 | 14.96 (0.96)                                            | 5.44 (0.22)                                              | 1.71 (0.09)                                 | 1.70 (0.09)                                  |
| Progesterone    | 97.92 (9.08)                | 49.49 (0.84)                | 163.96 (19.86)                                          | 112.75 (6.06)                                            | 1.67 (0.15)                                 | 2.28 (0.07)                                  |
| Sulfalazine     | 3.79 (0.08)                 | 0.20 (0.03)                 | 4.89 (0.13)                                             | 0.32 (0.03)                                              | 1.29 (0.03)                                 | 1.62 (0.17)                                  |
| Venetoclax      | 2.45 (0.41)                 | 2.44 (0.16)                 | 6.43 (0.28)                                             | 3.62 (0.84)                                              | 2.62 (0.12)                                 | 1.48 (0.21)                                  |

**Table S2.** RP-HPLC/UV Methods utilised in this study. ACN refers to Acetonitrile, MeOH refers to Methanol, TFA refers to Trifluoroacetic Acid, H<sub>2</sub>O refers to Water and NaAC refers to Sodium Acetate. \* denotes the fact that the mobile phase was adjusted to pH 2.5 with 5 %v/v Orthophosphoric acid.

| Drug            | Column                                                                                                                             | A                                 | B                                 | Ratio | Temp (°C) | Flow Rate (ml/min) | Inj. (µL) | Vol | λ (nm) |
|-----------------|------------------------------------------------------------------------------------------------------------------------------------|-----------------------------------|-----------------------------------|-------|-----------|--------------------|-----------|-----|--------|
| Danazol         | Symmetry C18 5 µm, 4,6 x 150 mm                                                                                                    | ACN                               | H <sub>2</sub> O                  | 55:45 | 25        | 1                  | 50        |     | 286    |
| Ketoconazole    | Symmetry C18 5 µm, 4,6 x 150 mm                                                                                                    | Phosphate buffer 10 mM, pH 8.5    | ACN                               | 40:60 | 25        | 0.8                | 50        |     | 297    |
| Venetoclax      | Zorbax Eclipse Plus-C18 column (5 µm, 4.6 mm x 150 mm) including Zorbax 156 Eclipse Plus-C18 guard column (5 µm, 4.6 mm x 12.5 mm) | ACN + 0.5 % TFA                   | H <sub>2</sub> O + 0.5 % TFA      | 53:47 | 40        | 1                  | 50        |     | 316    |
| Carvedilol      | Symmetry C18 5 µm, 4,6 x 150 mm                                                                                                    | ACN                               | NaAc 25 mM, pH 5.0                | 60:40 | 25        | 1                  | 50        |     | 280    |
| Clotrimazole    | Symmetry C18 5 µm, 4,6 x 150 mm                                                                                                    | MeOH                              | ACN                               | 95:5  | 25        | 1                  | 50        |     | 255    |
| Griseofulvin    | Symmetry C18 5 µm, 4,6 x 150 mm                                                                                                    | ACN                               | H <sub>2</sub> O                  | 55:45 | 25        | 1                  | 50        |     | 292    |
| Dipyridamole    | Gemini 5µ C18 4,6 x 250 mm                                                                                                         | ACN                               | H <sub>2</sub> O                  | 60:40 | 40        | 1                  | 20        |     | 282    |
| Felodipine      | Gemini 5µ C18 4,6 x 250 mm                                                                                                         | ACN                               | H <sub>2</sub> O                  | 70:30 | 25        | 1                  | 20        |     | 360    |
| Haloperidol     | Symmetry C18 5 µm, 4,6 x 150 mm                                                                                                    | ACN:MeOH                          | NaAc 25 mM, pH 5.0                | 65:35 | 25        | 0.8                | 50        |     | 247    |
| Naproxen        | Symmetry C18 5 µm, 4,6 x 150 mm                                                                                                    | ACN + 0.1% TFA                    | H <sub>2</sub> O + 0.1% TFA       | 60:40 | 25        | 1                  | 50        |     | 254    |
| Niclosamide     | Symmetry C18 5 µm, 4,6 x 150 mm                                                                                                    | 95:5:0.1 ACN:H <sub>2</sub> O:TFA | 5:95:0.1 ACN:H <sub>2</sub> O:TFA | 75:25 | 25        | 1                  | 50        |     | 332    |
| Progesterone    | Symmetry C18 5 µm, 4,6 x 150 mm                                                                                                    | ACN                               | NaAc 25 mM, pH 5.5                | 85:15 | 25        | 1                  | 50        |     | 254    |
| Sulfalazine     | Symmetry C18 5 µm, 4,6 x 150 mm                                                                                                    | ACN:H <sub>2</sub> O:TFA          | H <sub>2</sub> O:ACN:TFA          | 60:40 | 25        | 1                  | 50        |     | 357    |
| Fenofibric Acid | Symmetry C18 5 µm, 4,6 x 150 mm                                                                                                    | ACN*                              | H <sub>2</sub> O*                 | 70:30 | 25        | 1                  | 20        |     | 286    |

**Table S3.** Equilibrium solubility and aDS<sub>2h</sub> in sLBF<sub>Capmul</sub><sup>MC</sup> and sLBF<sub>Maisine</sub><sup>LC</sup> and the aDS ratio difference from average aDS and average aDS<sub>2h</sub> used to investigate the short term stability of the sLBF after cooling at AT.

|                 | Solubility 60°C (+2h)<br>Capmul MCM | Solubility 60°C<br>(+2h)<br>Maisine CC | aDS <sub>2h</sub><br>sLBF <sub>Capmul</sub> <sup>MC</sup> | aDS <sub>2h</sub><br>sLBF <sub>Maisine</sub> <sup>LC</sup> | aDS Ratio Unit<br>Change | aDS Ratio Unit<br>Change |
|-----------------|-------------------------------------|----------------------------------------|-----------------------------------------------------------|------------------------------------------------------------|--------------------------|--------------------------|
| Carvedilol      | 116.44 (6.57)                       | 27.75 (1.02)                           | 2.58 (0.13)                                               | 2.70 (0.12)                                                | 0.25                     | 0.11                     |
| Celecoxib       | 101.8 (0.0)                         | 39.6 (0.0)                             | 2.04 (0.13)                                               | 2.97 (0.14)                                                | 0.27                     | 0.25                     |
| Cinnarizine     | 100.1 (0.0)                         | 97.5 (0.0)                             | 2.78 (0.05)                                               | 3.33 (0.07)                                                | 0.51                     | 0.34                     |
| Clotrimazole    | 308.30 (1.28)                       | 172.73 (0.90)                          | 1.61 (0.03)                                               | 1.74 (0.04)                                                | 0.01                     | 0.13                     |
| Danazol         | 39.99 (3.54)                        | 22.57 (1.88)                           | 2.45 (0.41)                                               | 2.02 (0.12)                                                | 0.18                     | 0.01                     |
| Dipyridamole    | 29.55 (4.25)                        | 4.53 (0.49)                            | 2.91 (0.29)                                               | 3.29 (0.31)                                                | 0.26                     | 0.13                     |
| Felodipine      | 125.19 (5.94)                       | 45.89 (9.05)                           | 1.68 (0.08)                                               | 1.25 (0.14)                                                | 0.01                     | 0.10                     |
| Fenofibric Acid | 32.74 (3.17)                        | 17.86 (0.93)                           | 2.77 (0.66)                                               | 2.29 (0.08)                                                | 0.30                     | 0.08                     |
| Griseofulvin    | 12.21 (0.15)                        | 3.70 (0.24)                            | 2.59 (0.16)                                               | 1.92 (0.07)                                                | 0.07                     | 0.01                     |
| Haloperidol     | 45.37 (0.24)                        | 13.47 (0.79)                           | 1.45 (0.04)                                               | 1.76 (0.14)                                                | 0.02                     | 0.10                     |
| JNJ-2A          | 259.5 (0.0)                         | 65.8 (0.0)                             | 0.92 (0.03)                                               | 1.38 (0.02)                                                | 0.12                     | 0.23                     |
| Ketoconazole    | 224.87 (11.29)                      | 63.82 (3.81)                           | 2.14 (0.07)                                               | 2.15 (0.08)                                                | 0.03                     | 0.08                     |
| Naproxen        | 45.42 (7.01)                        | 20.39 (2.82)                           | 1.16 (0.13)                                               | 1.18 (0.12)                                                | 0.14                     | 0.32                     |
| Niclosamide     | 14.06 (1.02)                        | 5.13 (0.23)                            | 1.61 (0.09)                                               | 1.60 (0.08)                                                | 0.10                     | 0.10                     |
| Progesterone    | 133.30 (16.12)                      | 99.09 (7.27)                           | 1.36 (0.12)                                               | 2.00 (0.09)                                                | 0.31                     | 0.28                     |
| Sulfalazine     | 4.69 (0.23)                         | 0.30 (0.03)                            | 1.24 (0.04)                                               | 1.49 (0.16)                                                | 0.05                     | 0.13                     |
| Venetoclax      | 7.13 (1.29)                         | 2.89 (0.52)                            | 2.91 (0.32)                                               | 1.18 (0.13)                                                | 0.29                     | 0.30                     |

**Figure S1.** Unabridged Abbreviations of Independent Input Variables used in the final PLS and ANN models. Extra information about the descriptors used can be found at this reference (9).

Variables in PLS model predicting aDS sLBF<sub>Capmul</sub><sup>MC</sup>:

- **VMcGowan:** Mc Gowan's characteristic volume (2) .
- **N\_Hydrogn:** Number of hydrogens.
- **SHCH\_321:** Atom-type hydrogen E-state index for -CH<sub>3</sub>, -CH<sub>2</sub>- and >CH- groups (saturated aliphatic carbon) (3).
- **EEM\_Afc:** Sum of absolute values of scaled sigma Fukui indices on C (4, 5).
- **EEM\_AFnp:** Sum of absolute values of scaled sigma Fukui indices on nonpolar atoms.
- **EEM\_NFc:** Minimum scaled sigma Fukui index on C.
- **SHaaCH:** Atom-type hydrogen E-state index for aCHa groups (aromatic carbons).
- **Pi\_FMi4:** Fourth component of the autocorrelation vector of scaled pi Fukui- indices (electrophilic).

Variables in PLS model predicting aDS sLBF<sub>Maisine</sub><sup>LC</sup>:

- **EEM\_NFc:** Minimum scaled sigma Fukui index on C.
- **EEM\_NFnp:** Minimum scaled sigma Fukui index on nonpolar atoms.
- **HIVI-TC:** pIC<sub>50</sub> in log(mol/L) for inhibition of the HIV-1 Integrase 3'-processing.
- **N\_FrRotB:** Number of freely rotatable bonds.
- **NPA\_Q2:** Second component of the autocorrelation vector of NPA partial atomic charges.
- **Pi\_AQo:** Sum of absolute values of pi partial atomic charges on O.
- **Pi\_AQc:** Sum of absolute values of pi partial atomic charges on C.
- **Pi\_FPI3:** Third component of the autocorrelation vector of scaled pi Fukui+ indices (nucleophilic)
- **Pi\_FMi6:** Sixth component of the autocorrelation vector of scaled pi Fukui- indices (electrophilic).

Variables in MLP-ANN Predicting aDS sLBF<sub>Capmul</sub><sup>MC</sup>:

- **Pi\_FPI5:** Fifth component of the autocorrelation vector of pi Fukui(+) indices.
- **SolFactor:** Universal salt solubility factor based on S+Sw model.
- **N\_CYPAtoms:** Number of potential atoms that can be oxidized by CYP P450 enzymes.
- **EEM\_F4:** Fourth component of the autocorrelation vector of sigma Fukui indices.
- **Pi\_FPI3:** Third component of the autocorrelation vector of pi Fukui(+) indices.

- **NPA\_Q6:** Sixth component of the autocorrelation vector of estimated NPA partial atomic charges (6, 7).
- **MlogP:** Moriguchi estimation of log P (8).
- **MolVol:** Liquid molar volume (cm<sup>3</sup>/mol) at the normal boiling point is based on Schroeder's method.
- **NPA\_Q1:** First component of the autocorrelation vector of estimated NPA partial atomic charges.
- **S+S\_Intrinsic:** Intrinsic water solubility (mg/mL) based on S+Sw and S+pH\_Satd models.
- **EqualEta:** Equalized molecular hardness.
- **ΔH<sub>fus</sub>:** - Enthalpy of fusion in kJ/mol obtained from literature.
- **M\_CX:** Summation of numbers of carbon and halogen atoms weighted by C:1.0, F:0.5, Cl:1.0, Br:1.5, and I:2.0.
- **Pi\_MinQ:** Minimum Hückel pi atomic charge.
- **N\_Electr.** Total number of electrons in a molecule.

#### Variables in MLP-ANN Predicting aDS sLBF<sub>Maisine</sub><sup>LC</sup>

- **N\_Bonds:** Number of bonds.
- **Pi\_FPI1:** First component of the autocorrelation vector of pi Fukui(+) indices.
- **T\_Rads:** topological equivalent of Rads\_3D.
- **MaxQ:** Maximal PEOE Partial Atomic Charge.
- **N\_Atoms:** Number of atoms.
- **Pi\_FMi1:** First component of the autocorrelation vector of pi Fukui(-) indices.
- **HBDch:** Sum of Estimated NPA Partial Atomic Charges on HB Donor Hydrogens.
- **F\_AromB:** Aromatic bonds as fraction of total bonds.
- **NPA\_Q2:** Second component of the autocorrelation vector of estimated NPA partial atomic charges.
- **SsssCH:** Atom-type E-state index for >CH- groups.
- **NPA\_Q5:** Fifth component of the autocorrelation vector of estimated NPA partial atomic charges.

**Figure S2.** Predicted by Residual plots for sLBF<sub>Capmul</sub><sup>MC</sup> and sLBF<sub>Maisine</sub><sup>LC</sup> using PLS and ANN modelling.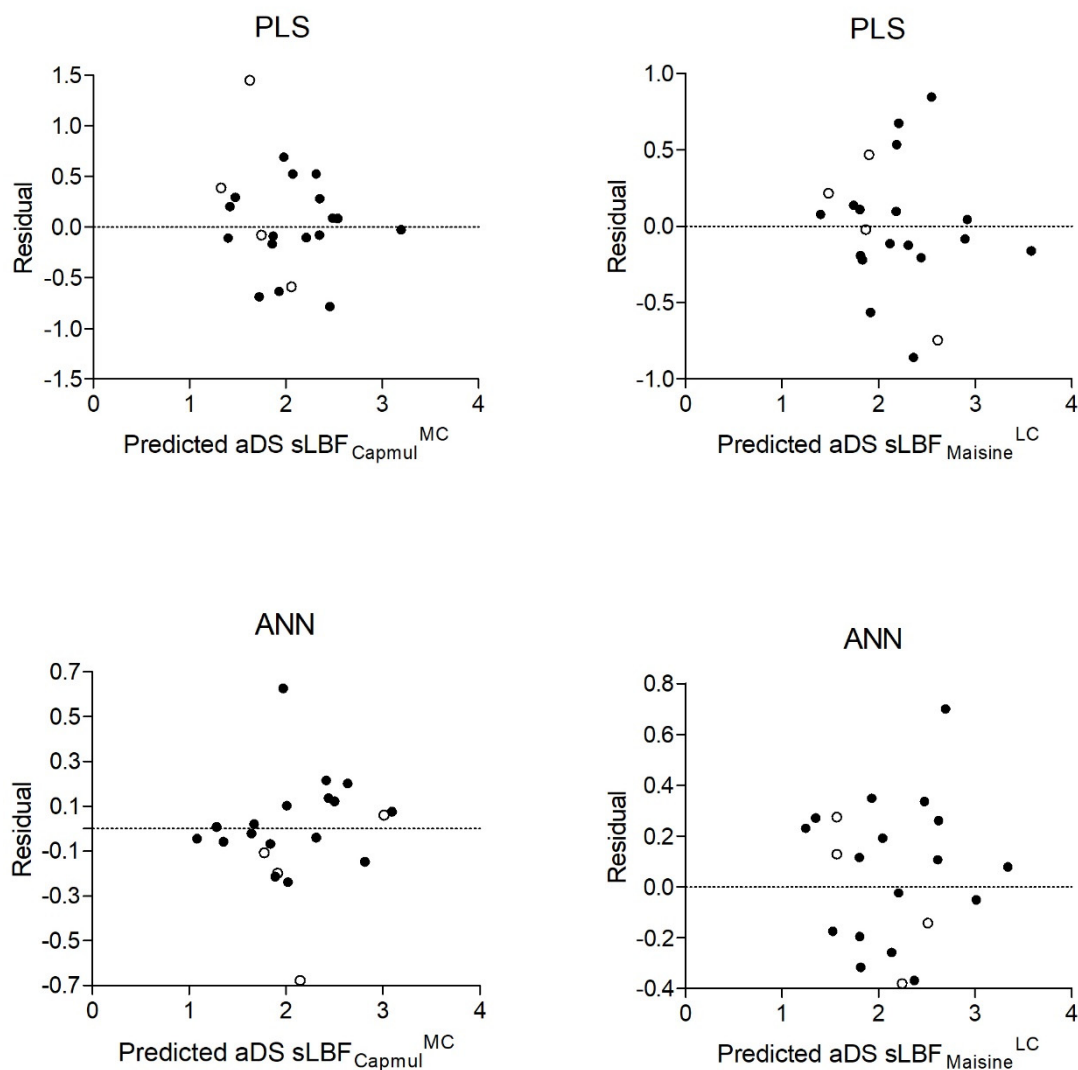

## References:

1. Ilie, A.R.; Griffin, B.T.; Kolakovic, R.; Vertzoni, M.; Kuentz, M.; Holm, R. Supersaturated lipid-based drug delivery systems - exploring impact of lipid composition type and drug properties on supersaturability and physical stability. *Drug Dev Ind Pharm.* **2020**, *46*, 356–64, doi: 10.1080/03639045.2020.1721526.
2. Zhao, Y.H.; Abraham, M.H.; Zissimos, A.M. Determination of McGowan Volumes for Ions and Correlation with van der Waals Volumes. *Journal of Chemical Information and Computer Sciences.* **2003**, *43*, 1848–54, doi: 10.1021/ci0341114.
3. Kier, L.B.; Hall, L.H. An Electrotopological-State Index for Atoms in Molecules. *Pharmaceutical Research.* **1990**, *7*, 801–7, doi: 10.1023/a:1015952613760.
4. Fukui, K.; Yonezawa, T.; Shingu, H.A. Molecular Orbital Theory of Reactivity in Aromatic Hydrocarbons. *The Journal of Chemical Physics.* **1952**, *20*, 772–25, doi: 10.1063/1.1700523.
5. Fradera, X.; Solà, M. Second-order atomic Fukui indices from the electron-pair density in the framework of the atoms in molecules theory. *J Comput Chem.* **2004**, *25*, 439–46, doi: 10.1002/jcc.10396.
6. Gasteiger, J.; Marsili, M. Iterative partial equalization of orbital electronegativity—a rapid access to atomic charges. *Tetrahedron.* **1980**, *36*, 3219–28, doi: 10.1016/0040-4020(80)80168-2.
7. Geidl, S.; Bouchal, T.; Raček, T.; Svobodová, Vařeková, R.; Hejret, V.; Křenek, A., et al. High-quality and universal empirical atomic charges for chemoinformatics applications. *Journal of Cheminformatics.* **2015**, *7*, 59, doi: 10.1186/s13321-015-0107-1.

8. Moriguchi, I.; Hirono, S.; Nakagome, I.; Hirano, H. Comparison of Reliability of log P Values for Drugs Calculated by Several Methods. *Chemical & Pharmaceutical Bulletin*. **1994**, *42*, 976-8, doi: 10.1248/cpb.42.976.
9. Todeschini, R.; Consonni, V. Molecular Descriptors for Chemoinformatics : Volume I & II Wiley-VCH Verlag GmbH & Co. KGaA **2009**.
